# Supplementary material for: A laboratory X-ray emission spectrometer for phosphorus Kα and Kβ study of air-sensitive samples
Source: Royal Society of Chemistry journal article supplement (doi:10.1039/d3ja00053b), 2023-01-01

# Supplemental Information:

## Laboratory X-ray Emission Spectrometer for Phosphorus $K\alpha$ and $K\beta$

### Study of Air-Sensitive Samples

Jared E. Abramson<sup>1\*</sup>, William M. Holden<sup>1,2,\*</sup>, Ricardo A. Rivera-Maldonado<sup>3</sup>, Alexandra Velian<sup>3</sup>, Brandi M. Cossairt<sup>3</sup>, Gerald T. Seidler<sup>1,\*\*</sup>

<sup>1</sup> Physics Department, University of Washington, Seattle WA, USA 98195

<sup>2</sup> easyXAFS LLC, Renton WA, USA 98057

<sup>3</sup> Chemistry Department, University of Washington, Seattle WA, USA 98195

**Table SI-1** Ni<sub>2</sub>P nanophase sample replicate phosphide fraction determined from fitting to reference spectra (Ni<sub>2</sub>P-Bulk and Ni<sub>3</sub>(PO<sub>4</sub>)<sub>2</sub>), standard deviation and standard error. See Fig. SI-1 for plots of fits.

| Replicate 5 Phosphide Fraction | Replicate 6 Phosphide Fraction | Replicate 7 Phosphide Fraction | Standard Deviation | Standard Error |
|--------------------------------|--------------------------------|--------------------------------|--------------------|----------------|
| 0.93                           | 0.94                           | 0.94                           | 0.010              | 0.0038         |
| 0.88                           | 0.89                           | 0.89                           | 0.011              | 0.0043         |
| 0.83                           | 0.82                           | 0.82                           | 0.0073             | 0.0028         |
| 0.78                           | 0.77                           | 0.77                           | 0.0049             | 0.0019         |
| 0.76                           | 0.74                           | 0.74                           | 0.0083             | 0.0031         |
| 0.72                           | 0.71                           | 0.70                           | 0.0073             | 0.0028         |
| 0.69                           | 0.68                           | 0.67                           | 0.0073             | 0.0028         |
| 0.69                           | 0.66                           | 0.65                           | 0.012              | 0.0047         |
| 0.54                           | 0.52                           | 0.50                           | 0.016              | 0.0060         |
| 0.44                           | 0.41                           | 0.38                           | 0.024              | 0.0090         |
| 0.32                           | 0.28                           | 0.26                           | 0.026              | 0.0097         |
| 0.23                           | 0.20                           | 0.19                           | 0.018              | 0.0069         |

**Table SI-2** Ni<sub>2</sub>P nanophase sample replicate phosphide fraction determined from fitting to 0.2 eV broadened reference spectra (Ni<sub>2</sub>P-Bulk and Ni<sub>3</sub>(PO<sub>4</sub>)<sub>2</sub>), standard deviation and standard error. See Fig. SI-1 for plots of fits.

| Replicate 5 Phosphide Fraction | Replicate 6 Phosphide Fraction | Replicate 7 Phosphide Fraction | Standard Deviation | Standard Error |
|--------------------------------|--------------------------------|--------------------------------|--------------------|----------------|
| 0.97                           | 0.97                           | 0.96                           | 0.0081             | 0.0030         |
| 0.91                           | 0.91                           | 0.91                           | 0.0088             | 0.0033         |
| 0.85                           | 0.85                           | 0.85                           | 0.0053             | 0.0020         |
| 0.81                           | 0.80                           | 0.79                           | 0.0064             | 0.0024         |
| 0.77                           | 0.76                           | 0.76                           | 0.0070             | 0.0026         |
| 0.74                           | 0.72                           | 0.72                           | 0.0076             | 0.0029         |
| 0.71                           | 0.69                           | 0.68                           | 0.0090             | 0.0034         |
| 0.70                           | 0.67                           | 0.66                           | 0.014              | 0.0052         |
| 0.54                           | 0.52                           | 0.49                           | 0.018              | 0.0069         |
| 0.43                           | 0.40                           | 0.36                           | 0.027              | 0.010          |
| 0.30                           | 0.26                           | 0.24                           | 0.026              | 0.0097         |
| 0.20                           | 0.17                           | 0.16                           | 0.018              | 0.0069         |

**Figure SI-1:** P  $K\alpha$  and  $K\beta$  reference spectra,  $Ni_2P$ -Bulk and  $Ni_3(PO_4)_2$ , with  $Na_2HPO_4$  reference spectra. The  $Na_2HPO_4$  spectra was used to set the energy scale, see text for details.

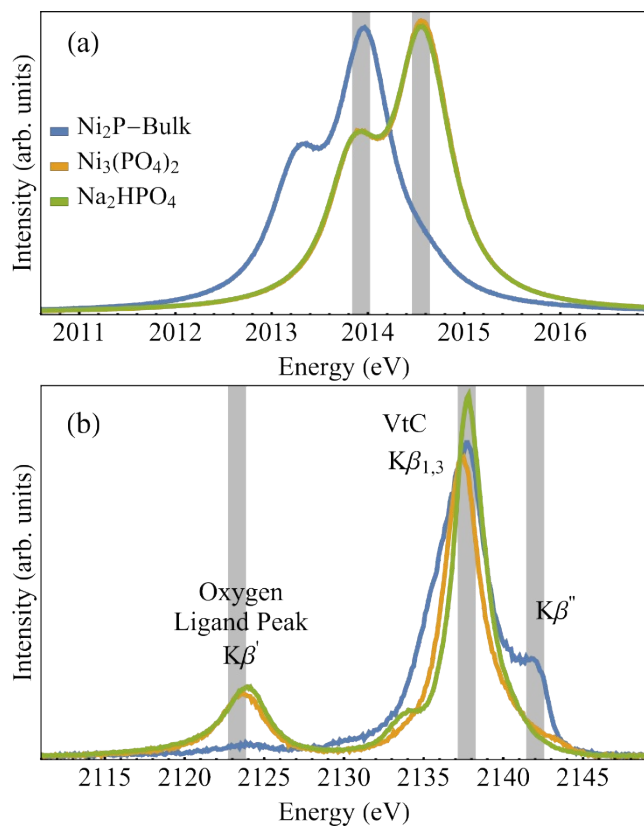

**Figure SI-2 (below and following pages):** A compendium of P  $K\alpha$  XES results with fits, references, and residuals for all  $Ni_2P$  nanophase samples after summing replicate spectra. In each case the left column is the fit with the original, unbroadened references, while the right column uses the slightly broadened reference spectra discussed in the text.

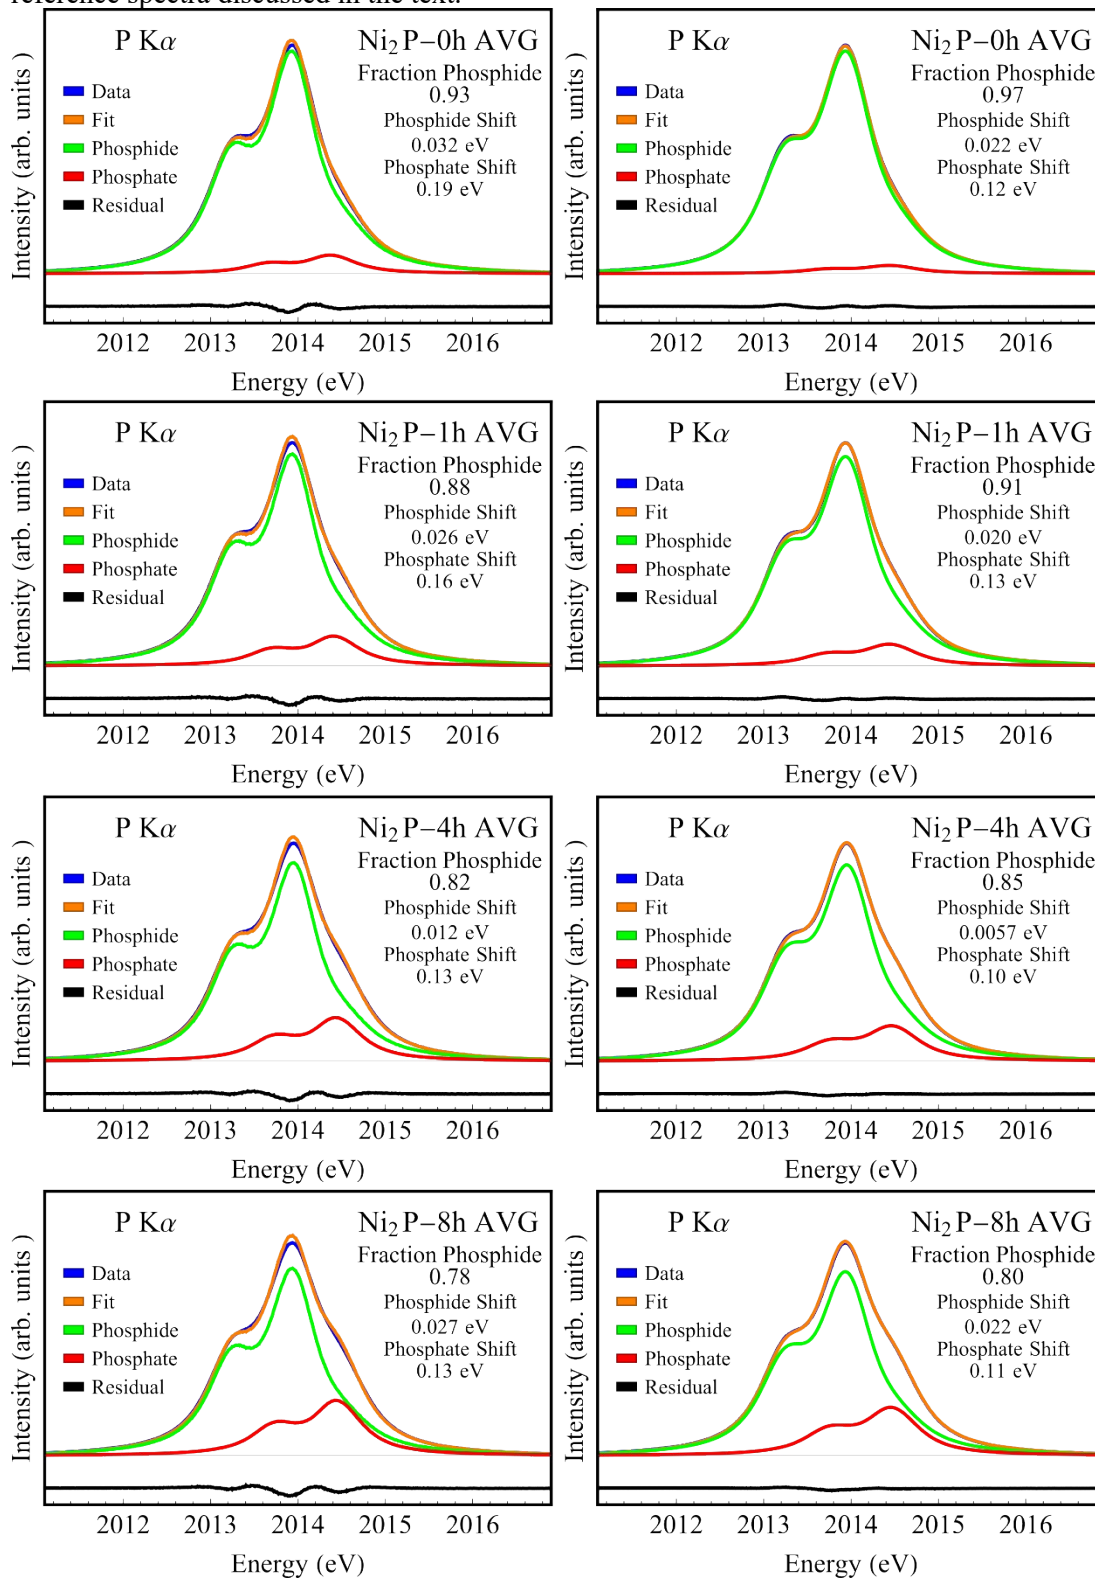

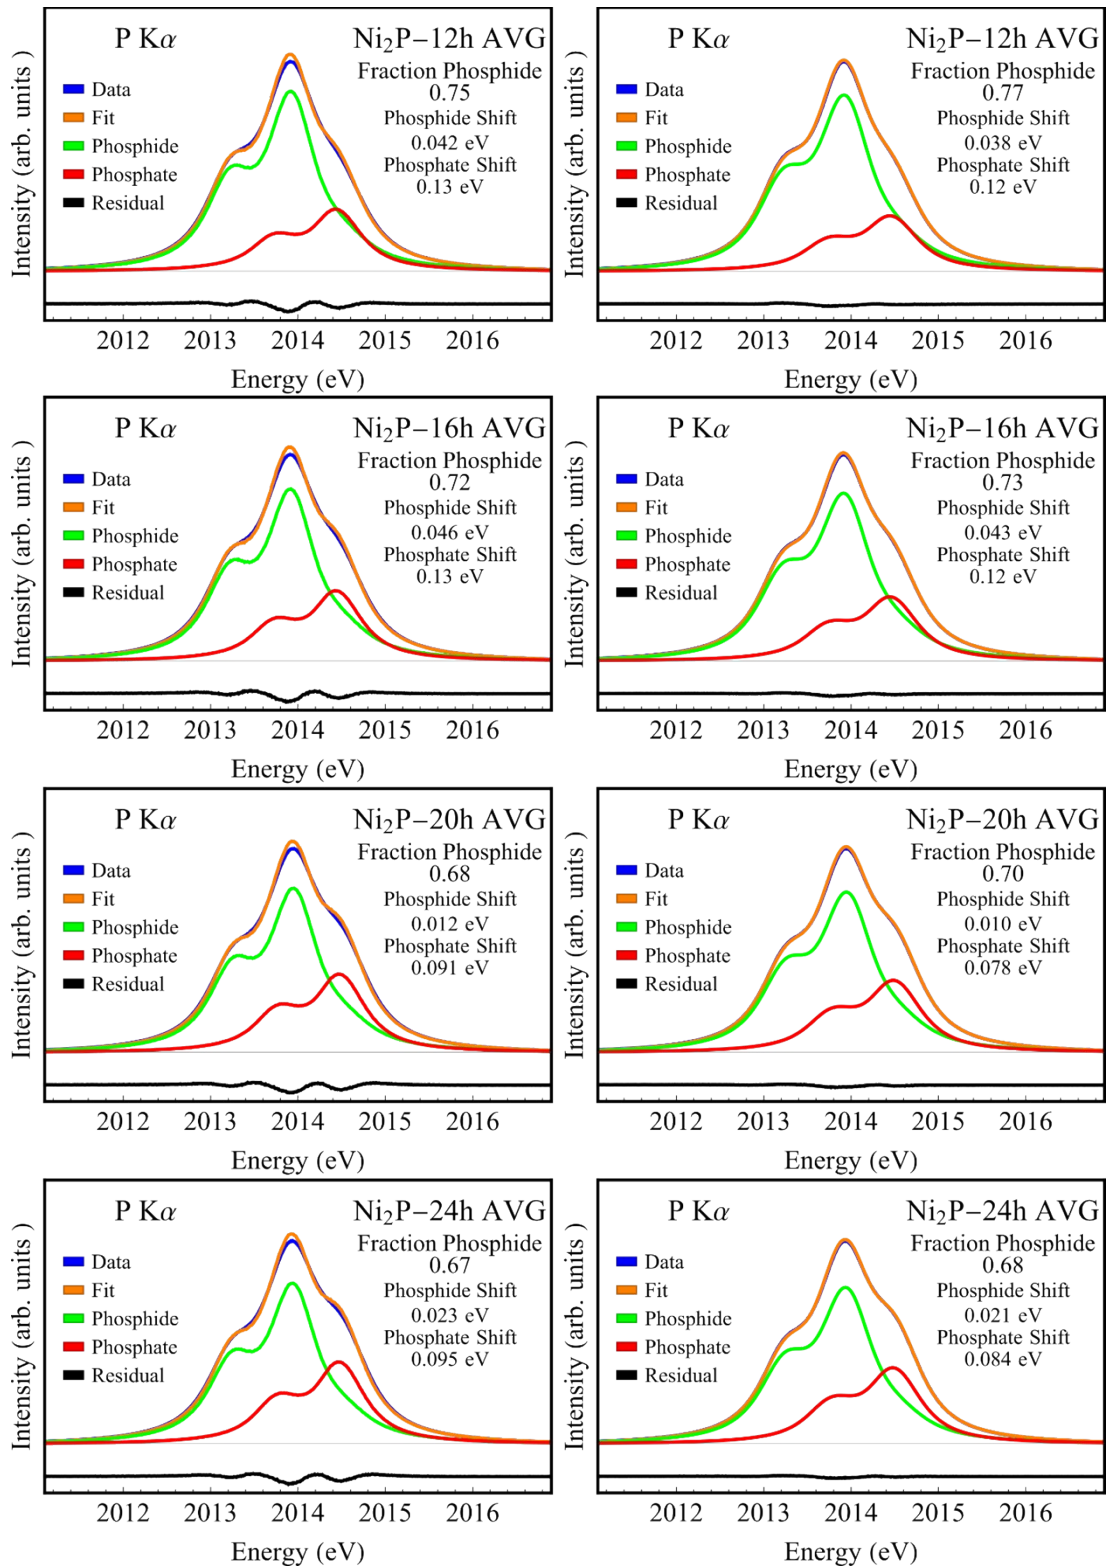

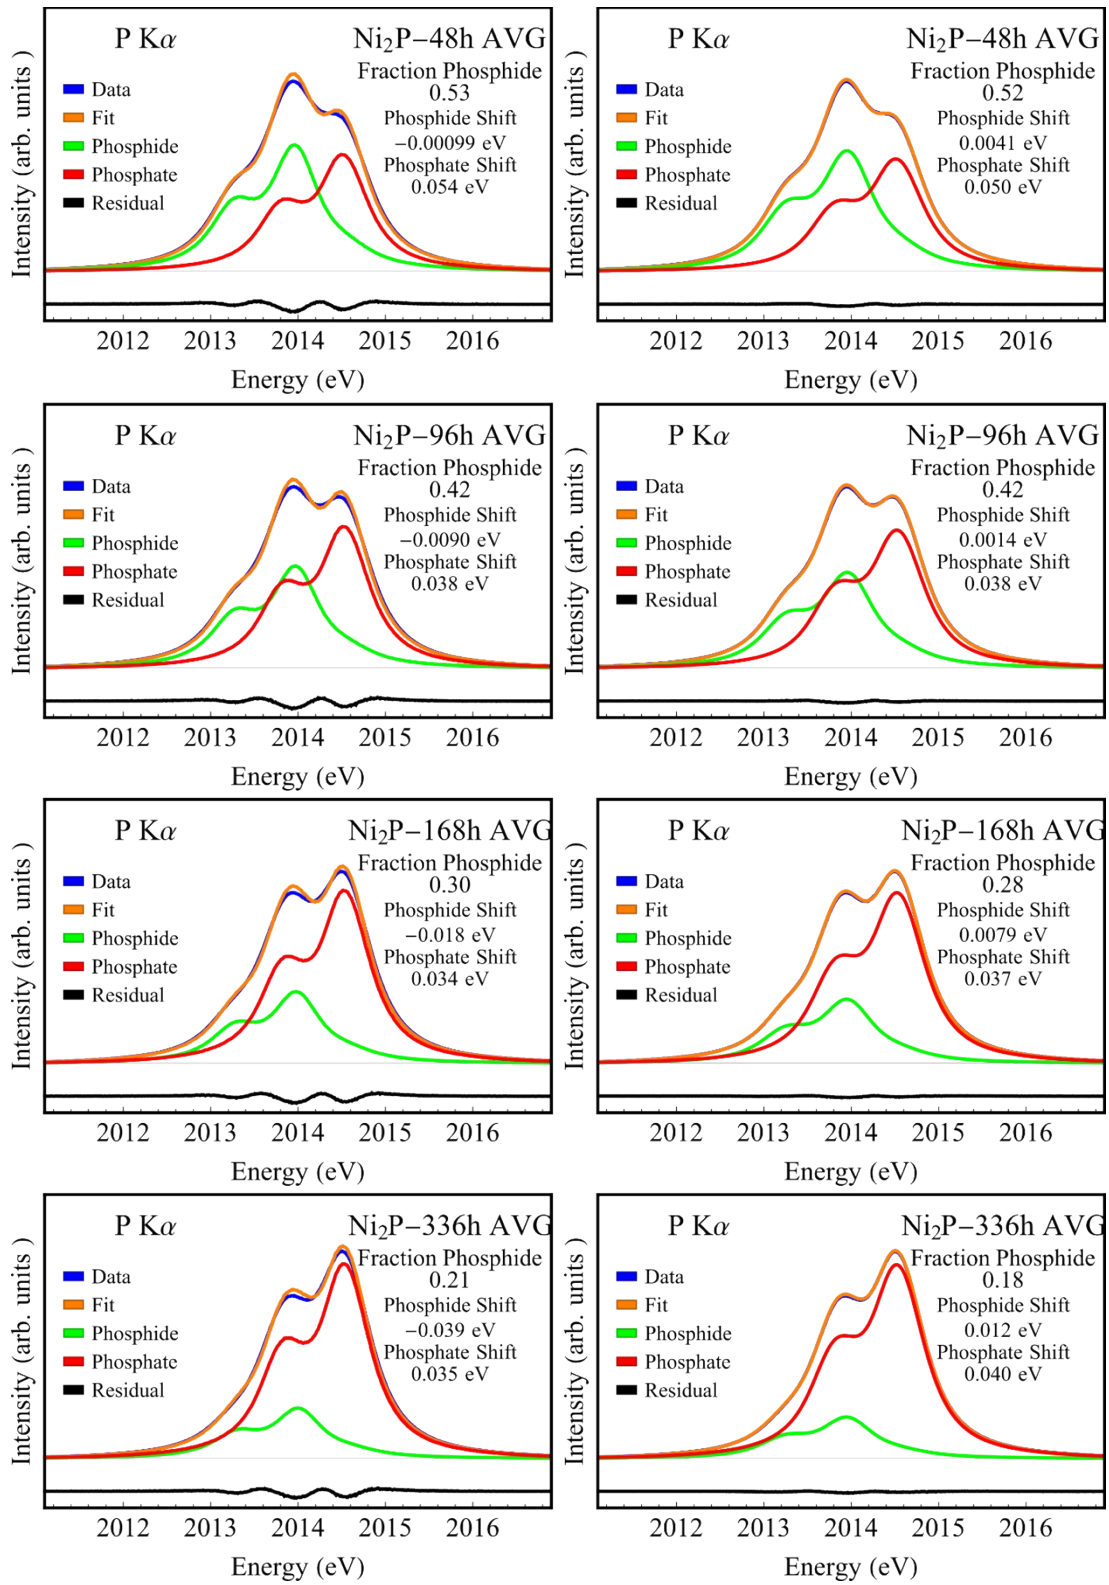

**Figure SI-3:** Plots showing the absolute divergence from the Bragg energy as a function of distance from the analyzer center for both the P K $\alpha$  and P K $\beta$  spectrometers. The energy divergence is calculated by Bragg's law using an angular divergence due to the analyzer crystal not lying perfectly on circle, also known as Johann error. The vertical dashed black line corresponds to the masking on the P K $\beta$  analyzer and is used to cap the divergence due to Johann error. The difference in magnitude of divergence for the K $\alpha$  versus K $\beta$  analyzer is due to the more favorable Bragg angle of the K $\alpha$  analyzer.

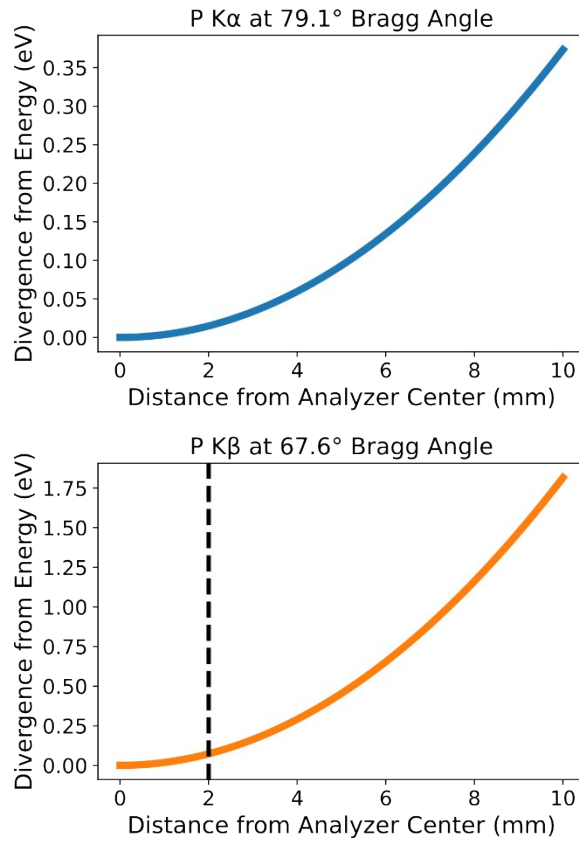



**Figure SI-4:** Plot showing the fitting of the  $\text{Ni}_3(\text{PO}_4)_2$  reference spectra to two Voigt profiles. The fitting was performed using the `lmfit` package in python. Both profiles use a Gaussian FWHM of 0.29 and a Lorentzian FWHM of 0.53. The Lorentzian component is associated with the energy broadening due to the core hole lifetime of the emission and the Gaussian component is associated with the spectrometer energy broadening. The Lorentzian FWHM of 0.53 is within the range of reported values for the P  $\text{K}\alpha$  emission.

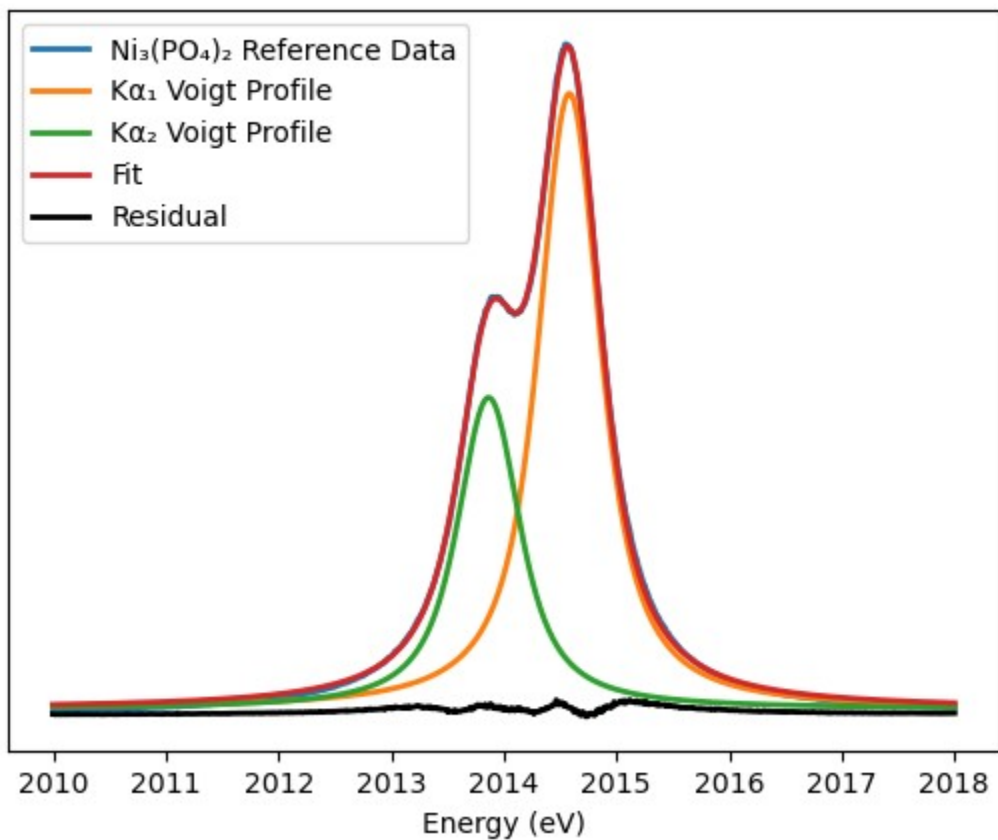

Supplement: d3ja00053b1.pdf [file d3ja00053b1.pdf]
